# Supplementary material
Source: PubMed Central journal article supplement (PMC10489892)
Supplement: ehp12565.smcontents.508.pdf [file ehp12565.smcontents.508.pdf]

**Note to readers with disabilities:** *EHP* strives to ensure that all journal content is accessible to all readers. However, some figures and Supplemental Material published in *EHP* articles may not conform to [508 standards](#) due to the complexity of the information being presented. If you need assistance accessing journal content, please contact [ehp508@niehs.nih.gov](mailto:ehp508@niehs.nih.gov). Our staff will work with you to assess and meet your accessibility needs within 3 working days.

### **Supplemental Material**

#### **The Effect of Individual or Study-Wide Report-Back on Knowledge, Concern, and Exposure-Reducing Behaviors Related to Endocrine-Disrupting Chemicals**

Katherine E. Boronow, Barbara Cohn, Laurie Havas, Marj Plumb, and Julia Green Brody

#### **Table of Contents**

##### **Survey Questions**

**Table S1.** Odds ratios from logistic regressions evaluating the interaction between race and education and correctly answering environmental health knowledge questions at baseline (n = 135).

**Table S2.** Multiple regression model evaluating the interaction between race and education and baseline environmental health knowledge index score (n = 135).

**Table S3.** Odds ratios from logistic regressions evaluating the interaction between education and race and concern about health effects of certain chemicals at baseline (n = 135).

**Table S4.** Frequency of performing exposure-related environmental health behaviors, before and after receiving report-back.

**Figure S1.** Selected screenshots from the interactive MyCHDSReport website sample report (<http://derbidemo.com>). Screenshots show the welcome page, summary of results page, PCBs chemical group page, PCBs results graphs, overall study results page (excerpted), and overview page for exposure reduction information. © 2014 Child Health and Development Studies, Silent Spring Institute. Reprinted with permission.
